# Supplementary material for: Rescue of high-specificity Cas9 variants using sgRNAs with matched 5’ nucleotides
Source: PubMed Central journal article supplement (PMC5686910; doi:10.1186/s13059-017-1355-3), 2017-11-15
Supplement: 13059_2017_1355_MOESM1_ESM.pdf [file 13059_2017_1355_MOESM1_ESM.pdf]

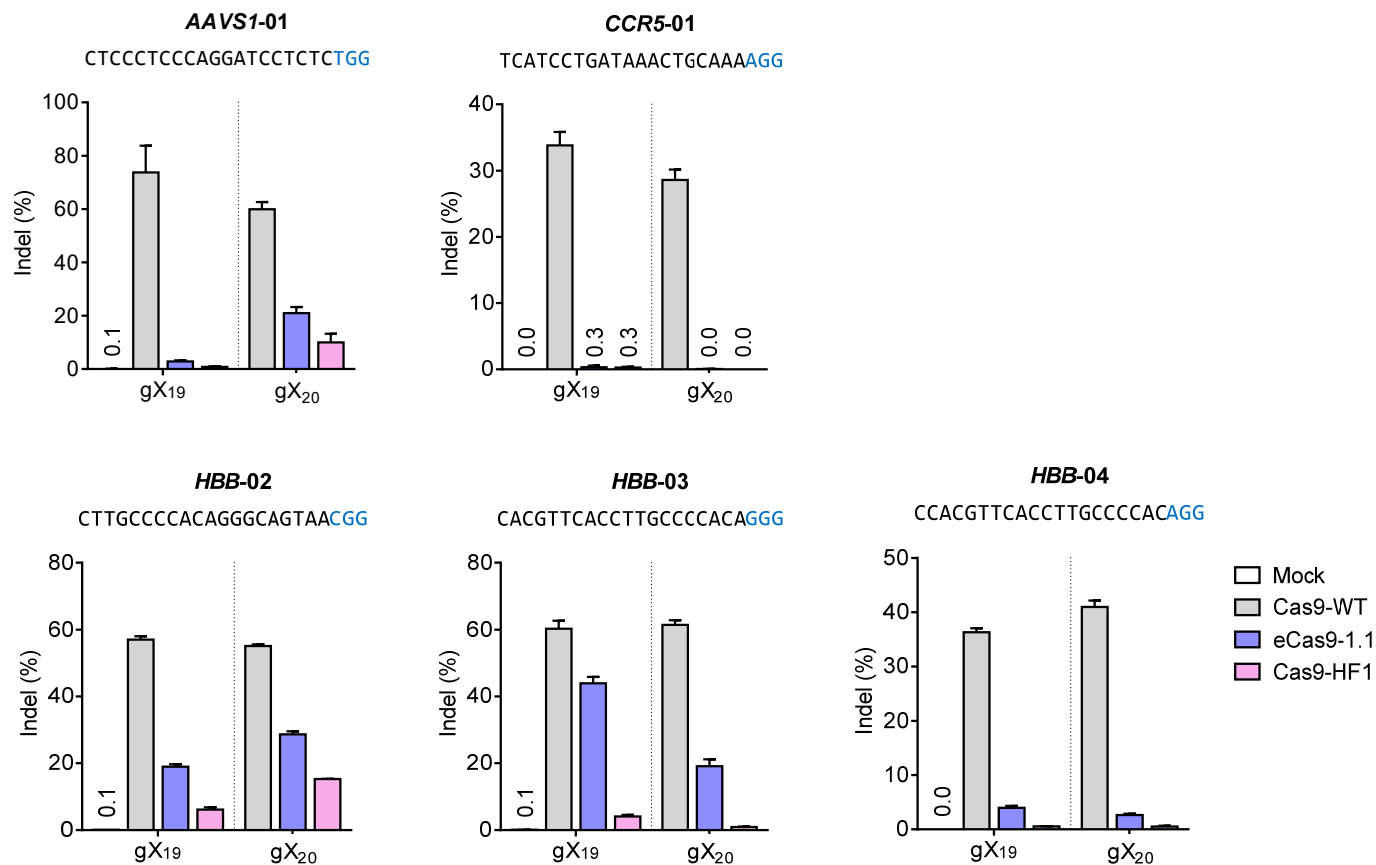

**Figure S1. Comparison of editing efficiencies of Cas9-WT and high-fidelity Cas9 variants using gX<sub>19</sub> and gX<sub>20</sub> sgRNAs in HEK293T cells.**

Indel frequencies (measured by targeted deep sequencing) of Cas9-WT and Cas9 variants at five on-target sites with a 5' C or 5' T nucleotide obtained using gX<sub>19</sub> and gX<sub>20</sub> sgRNAs in HEK293T cells. PAM sequences are shown in blue. Error bars, s.e.m. of three biological replicates.

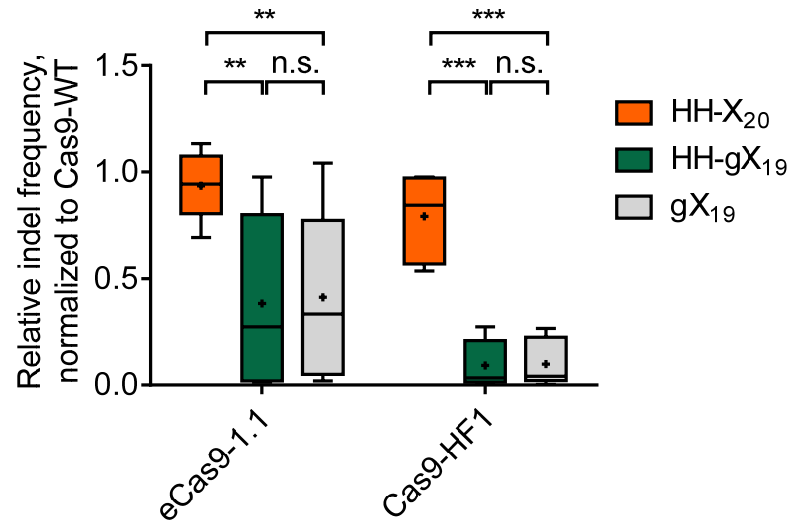

**Figure S2. Comparison of relative indel frequencies of Cas9 variants normalized to that of Cas9-WT in HeLa cells.**

Distributions of relative indel frequencies of Cas9 variants normalized to that of Cas9-WT obtained using HH-X<sub>20</sub>, HH-gX<sub>19</sub> and gX<sub>19</sub> sgRNAs at six endogenous target sites in HeLa cells. Box and whisker plots: center lines show the medians; crosses show the means. Statistical significances were calculated by paired t-test. \*\*  $P < 0.01$ , \*\*\*  $P < 0.001$ .

a

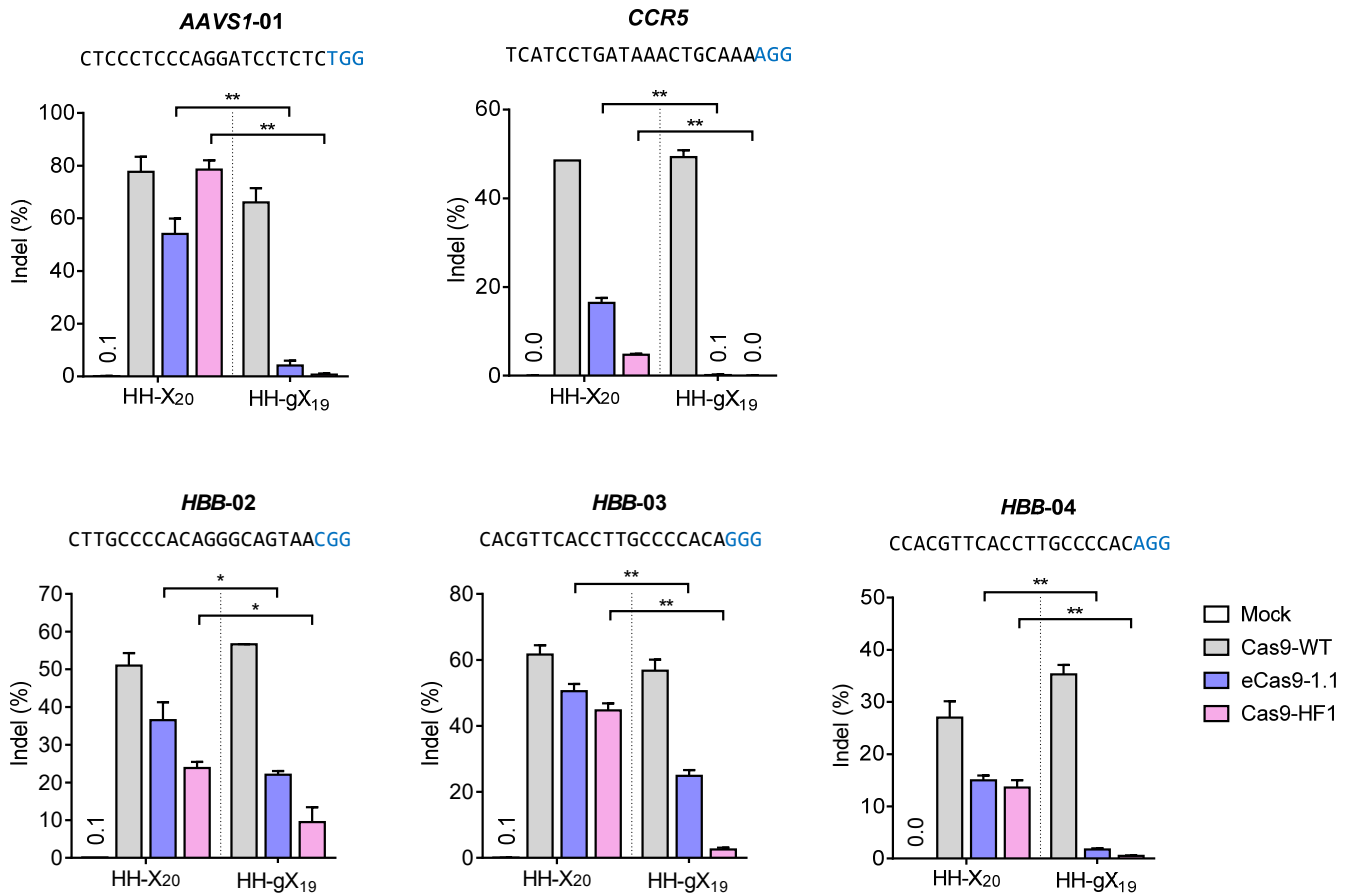

b

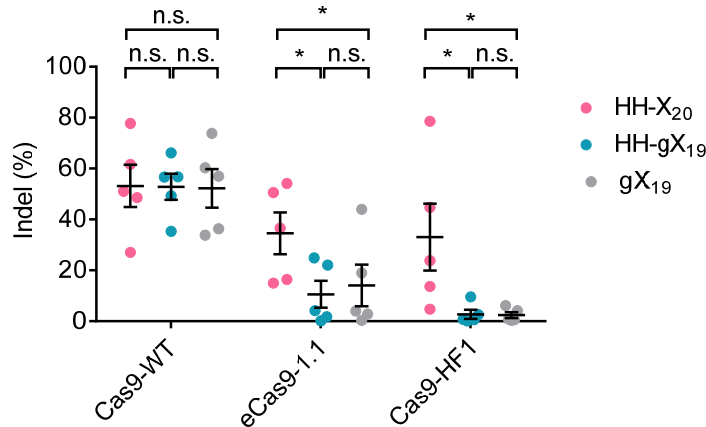

c

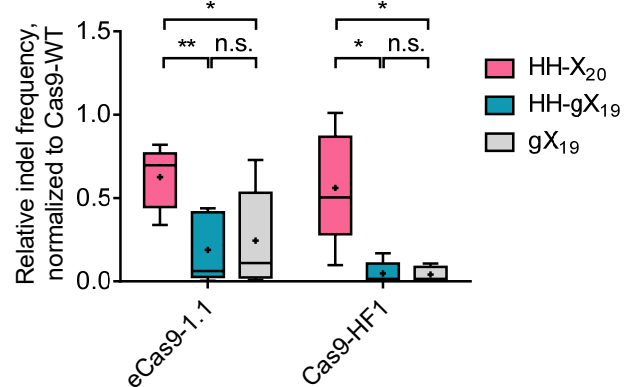

**Figure S3. Comparison of indel frequencies of HH-X<sub>20</sub>, HH-gX<sub>19</sub> and gX<sub>19</sub> sgRNAs in combination with Cas9-WT and Cas9 variants in HEK293T cells.**

(a) HH-X<sub>20</sub> or HH-gX<sub>19</sub> were tested in combination with Cas9-WT and high-fidelity Cas9 variants at five target sites in HEK293T cells. Indel frequencies were measured using targeted deep sequencing. The PAM is shown in blue. Error bars, s.e.m. of three biological replicates. Statistical significances were calculated by unpaired t-test. \*  $P < 0.05$ , \*\*  $P < 0.01$ . (b) Mean indel frequencies  $\pm$  s.e.m. are shown at the five target sites in HEK293T cells. Statistical significances were calculated by paired t-test. \*  $P < 0.05$ . (c) Distributions of relative indel frequencies of eCas9-1.1 and Cas9-HF1 normalized to that of Cas9-WT. Box and whisker plots: center lines show the medians; crosses show the means.

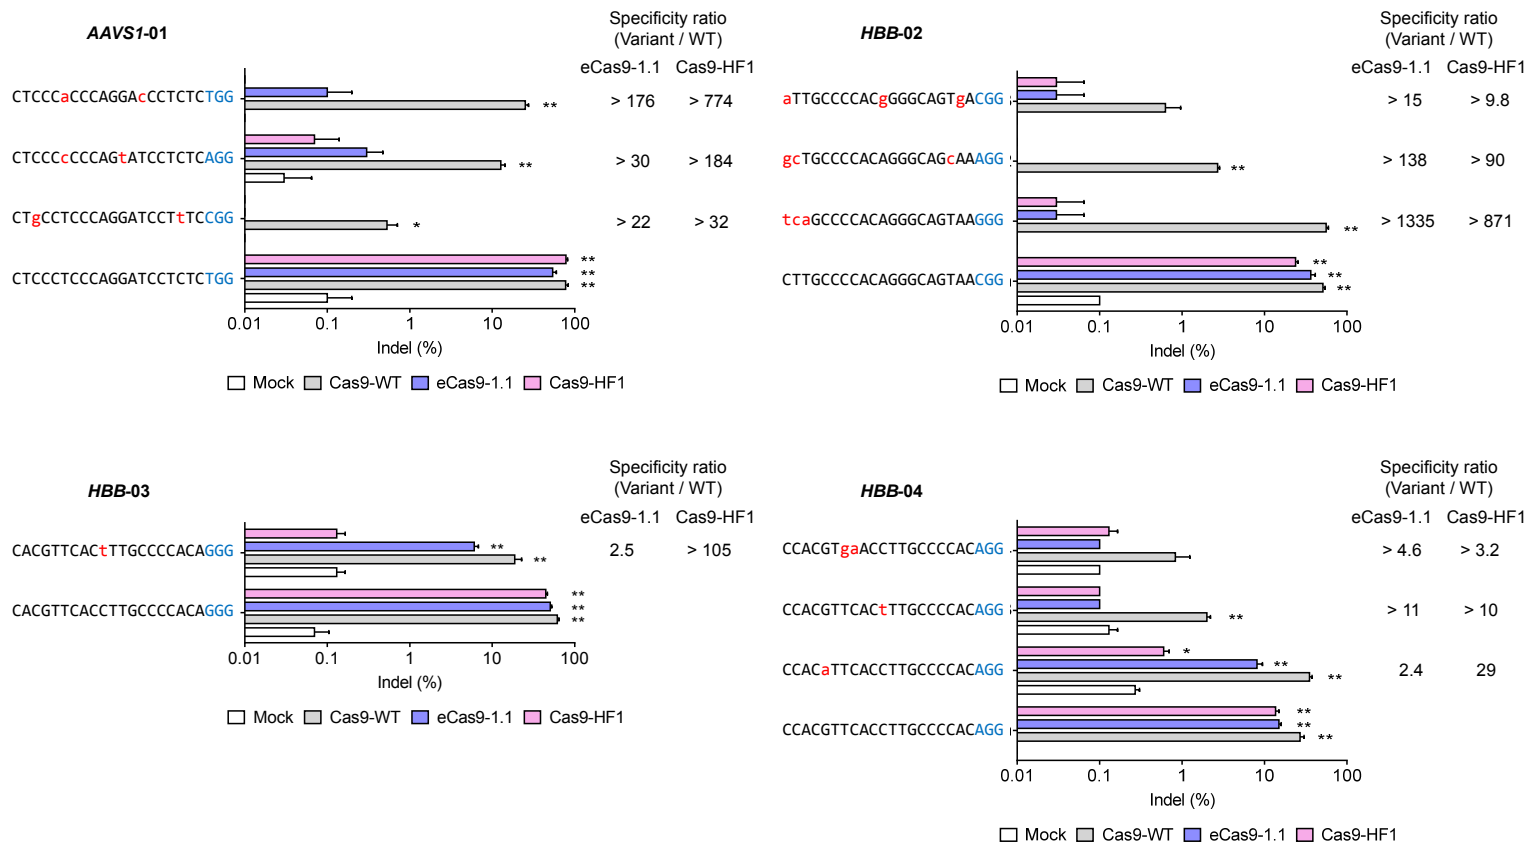

**Figure S4. Specificities of high-fidelity Cas9 variants in combination with HH-X<sub>20</sub> sgRNA in HEK293T cells.**

The HH-X<sub>20</sub> sgRNA expression plasmid was co-transfected with the plasmid encoding Cas9-WT or a Cas9 variant into HEK293T cells. Indel frequencies at on- and off-target sites were measured by targeted deep sequencing. PAM sequences are shown in blue. Mismatched bases are shown in red. The specificity ratio indicates the fold difference between the ratio of on-target indel frequencies to off-target indel frequencies obtained using Cas9 variants and that obtained using Cas9-WT. Error bars, s.e.m. of three biological replicates. Indel frequencies significantly above those of the mock transfected sample are shown by asterisks (\*  $P < 0.05$ , \*\*  $P < 0.01$ ).

**Table S1. Indel frequencies of Cas9-WT, eCas9-1.1 and Cas9-HF1 combined with gX<sub>19</sub> sgRNAs at 26 target sites with an HX<sub>19</sub> sequence.**

gX<sub>19</sub> sgRNAs were co-transfected with Cas9-WT or Cas9 variants into HeLa cells and indel frequencies at 26 sites were measured by targeted deep sequencing. Relative indel frequency is the ratio of indel (%) of Cas9 variant to that of Cas9-WT. Six target sites analyzed in further study with HH-X20 sgRNA are shown in yellow.

| gene  | sgRNA # | Spacer type      | Target sequence (X <sub>20</sub> -PAM) | Indel (%) |       |   |          |       |   |           |       |   |          |       |   | Relative Indel frequency, normalized to Cas9-WT |          |
|-------|---------|------------------|----------------------------------------|-----------|-------|---|----------|-------|---|-----------|-------|---|----------|-------|---|-------------------------------------------------|----------|
|       |         |                  |                                        | Mock      |       |   | Cas9-WT  |       |   | eCas9-1.1 |       |   | Cas9-HF1 |       |   | eCas9-1.1                                       | Cas9-HF1 |
|       |         |                  |                                        | Mean (%)  | STDEV | N | Mean (%) | STDEV | N | Mean (%)  | STDEV | N | Mean (%) | STDEV | N |                                                 |          |
| AAVS1 | 01      | CX <sub>19</sub> | CTCCCTCCCAGGATCCTCTCTGG                | 0.59      | 0.21  | 3 | 71.9     | 8.1   | 3 | 6.7       | 0.3   | 3 | 2.7      | 0.4   | 3 | 0.09                                            | 0.04     |
| HBB   | 02      | CX <sub>19</sub> | CTTGCCCCACAGGGCAGTAACGG                | 0.09      | 0.07  | 3 | 78.2     | 5.8   | 3 | 44.8      | 7.6   | 3 | 16.4     | 3.1   | 3 | 0.57                                            | 0.21     |
| HBB   | 03      | CX <sub>19</sub> | CACGTTACCTTGCCCCACAGGG                 | 0.40      | 0.19  | 3 | 75.0     | 6.4   | 3 | 78.2      | 2.4   | 3 | 20.0     | 1.5   | 3 | 1.04                                            | 0.27     |
| HBB   | 04      | CX <sub>19</sub> | CCACGTTACCTTGCCCCACAGG                 | 0.09      | 0.03  | 3 | 48.4     | 11.6  | 3 | 33.0      | 1.2   | 3 | 2.2      | 0.4   | 3 | 0.68                                            | 0.05     |
| EMX1  | C1      | CX <sub>19</sub> | CGGCAGAAGCTGGAGGGAAGG                  | 0.05      | 0.02  | 2 | 50.9     | 5.8   | 2 | 8.0       | 0.3   | 2 | 0.1      | 0.0   | 2 | 0.16                                            | 0.00     |
| EMX1  | C2      | CX <sub>19</sub> | CACGAAGCAGGCAATGGGGAGG                 | 0.11      | 0.08  | 2 | 52.1     | 2.8   | 2 | 52.0      | 5.8   | 2 | 19.2     | 3.6   | 2 | 1.00                                            | 0.37     |
| EMX1  | C3      | CX <sub>19</sub> | CGATGCACCTCAATGACTAGG                  | 0.00      | 0.00  | 2 | 69.5     | 12.6  | 2 | 29.9      | 9.6   | 2 | 2.2      | 0.3   | 2 | 0.43                                            | 0.03     |
| AAVS1 | T1      | TX <sub>19</sub> | TGCTTACGATGGAGCCAGAGAG                 | 0.01      | 0.01  | 2 | 66.1     | 9.8   | 2 | 0.0       | 0.0   | 2 | 0.0      | 0.0   | 2 | 0.00                                            | 0.00     |
| AAVS1 | T2      | TX <sub>19</sub> | TAAGCAAACCTTAGAGGTTCTGG                | 0.00      | 0.00  | 2 | 75.0     | 6.9   | 2 | 10.0      | 2.9   | 2 | 6.2      | 0.6   | 2 | 0.13                                            | 0.08     |
| AAVS1 | T3      | TX <sub>19</sub> | TCTCCTTGCCAGAACCTCTAAGG                | 0.01      | 0.01  | 2 | 52.6     | 11.2  | 2 | 35.2      | 17.7  | 2 | 10.9     | 9.1   | 2 | 0.67                                            | 0.21     |
| HBB   | T1      | TX <sub>19</sub> | TCTGCCGTTACTGCCCTGTGGGG                | 0.00      | 0.00  | 2 | 77.8     | 0.1   | 2 | 75.8      | 4.5   | 2 | 70.4     | 3.5   | 2 | 0.97                                            | 0.90     |
| HBB   | T2      | TX <sub>19</sub> | TGGTCTACCTTGAGCCAGAGG                  | 0.02      | 0.02  | 2 | 39.1     | 16.3  | 2 | 30.2      | 18.0  | 2 | 32.4     | 13.1  | 2 | 0.77                                            | 0.83     |
| HBB   | T3      | TX <sub>19</sub> | TCAAAGAACCTCTGGGTCCAAGG                | 0.02      | 0.03  | 2 | 46.9     | 15.9  | 2 | 0.1       | 0.1   | 2 | 0.0      | 0.0   | 2 | 0.00                                            | 0.00     |
| HBB   | T4      | TX <sub>19</sub> | TCCACTCTGATGCTGTATGGG                  | 0.00      | 0.00  | 2 | 46.8     | 1.2   | 2 | 1.1       | 0.4   | 2 | 0.4      | 0.1   | 2 | 0.02                                            | 0.01     |
| EMX1  | 04      | TX <sub>19</sub> | TCTGGAACACACCTTCACTGG                  | 0.01      | 0.01  | 3 | 81.5     | 1.6   | 3 | 80.3      | 4.2   | 3 | 81.5     | 4.0   | 3 | 0.99                                            | 1.00     |
| EMX1  | 05      | TX <sub>19</sub> | TGTACTTTGCTCCGGTTCTGG                  | 0.01      | 0.01  | 3 | 84.8     | 7.9   | 3 | 5.1       | 0.5   | 3 | 2.3      | 0.5   | 3 | 0.06                                            | 0.03     |
| CCR5  | 01      | TX <sub>19</sub> | TCATCTGTATAAACTGCAAAAAGG               | 0.10      | 0.05  | 3 | 74.1     | 5.1   | 3 | 1.4       | 0.6   | 3 | 0.2      | 0.1   | 3 | 0.02                                            | 0.00     |
| AAVS1 | A1      | AX <sub>19</sub> | AGATAAGGAATCGCTAACAGG                  | 0.01      | 0.01  | 2 | 73.0     | 0.0   | 2 | 71.9      | 9.1   | 2 | 64.2     | 12.2  | 2 | 0.98                                            | 0.88     |
| AAVS1 | A2      | AX <sub>19</sub> | AGACCCAATATCAGGAGACTAGG                | 0.02      | 0.03  | 2 | 76.6     | 3.5   | 2 | 80.2      | 5.7   | 2 | 80.5     | 1.9   | 2 | 1.05                                            | 1.05     |
| HBB   | A1      | AX <sub>19</sub> | AAGGTGAACGTGGATGAAGTTGG                | 0.00      | 0.00  | 2 | 69.9     | 4.3   | 2 | 63.6      | 1.8   | 2 | 65.1     | 8.4   | 2 | 0.91                                            | 0.93     |
| EMX1  | 01      | AX <sub>19</sub> | ACCGGAGGACAAAGTACAAACGG                | 0.02      | 0.02  | 3 | 87.6     | 0.6   | 3 | 88.3      | 0.8   | 3 | 88.9     | 2.3   | 3 | 1.01                                            | 1.01     |
| EMX1  | 02      | AX <sub>19</sub> | ATTGCCACGAAGCAGGCAATGG                 | 0.01      | 0.02  | 3 | 83.4     | 0.8   | 3 | 81.9      | 1.4   | 3 | 84.9     | 4.2   | 3 | 0.98                                            | 1.02     |
| EMX1  | 03      | AX <sub>19</sub> | ACCACACCTTCACTGGGCCAGG                 | 0.01      | 0.00  | 3 | 80.9     | 3.3   | 3 | 81.1      | 2.0   | 3 | 84.5     | 3.7   | 3 | 1.00                                            | 1.04     |
| CCR5  | 13      | AX <sub>19</sub> | AAAGATAGTCATCTGGGGCTGG                 | 0.01      | 0.01  | 3 | 77.2     | 2.8   | 3 | 84.0      | 2.0   | 3 | 83.6     | 0.9   | 3 | 1.09                                            | 1.08     |
| CCR5  | 16      | AX <sub>19</sub> | AAAGTGTGATCACTGGGTGGTGG                | 0.04      | 0.03  | 3 | 87.4     | 2.5   | 3 | 88.7      | 1.0   | 3 | 87.4     | 2.3   | 3 | 1.01                                            | 1.00     |
| CCR5  | 18      | AX <sub>19</sub> | AGATGACTATCTTAATGTCTGG                 | 0.00      | 0.00  | 3 | 86.3     | 3.3   | 3 | 84.6      | 0.8   | 3 | 75.5     | 5.3   | 3 | 0.98                                            | 0.88     |
| EMX1  | N/A     | GX <sub>19</sub> | GAGTCCGAGCAGAAGAAGGGG                  | 0.39      | 0.03  | 3 | 91.9     | 1.1   | 3 | 95.8      | 3.0   | 3 | 93.1     | 0.9   | 3 | 1.04                                            | 1.01     |
| VEGFA | 03      | GX <sub>19</sub> | GGTGAGTGAGTGTGCGTGTGG                  | 0.01      | 0.01  | 3 | 95.4     | 1.9   | 3 | 95.9      | 1.6   | 3 | 94.3     | 2.1   | 3 | 1.01                                            | 0.99     |

**Table S2. Comparison of Cas9-WT and Cas9 variants using gX<sub>19</sub> sgRNAs at 26 target sites with an HX<sub>19</sub> sequence.**

Means of indel (%) plotted in Figure 2a and means and medians of relative indel frequency of Cas9 variant to that of Cas9-WT at 26 sites plotted in Figure 2b.

| Spacer type      | Indel (%) |       |    |           |       |    |          |       |    | Relative Indel frequency, normalized to Cas9-WT |        |          |        |
|------------------|-----------|-------|----|-----------|-------|----|----------|-------|----|-------------------------------------------------|--------|----------|--------|
|                  | Cas9-WT   |       |    | eCas9-1.1 |       |    | Cas9-HF1 |       |    | eCas9-1.1                                       |        | Cas9-HF1 |        |
|                  | Mean (%)  | S.E.M | N  | Mean (%)  | S.E.M | N  | Mean (%) | S.E.M | N  | Mean                                            | Median | Mean     | Median |
| CX <sub>19</sub> | 63.7      | 4.8   | 7  | 36.1      | 9.5   | 7  | 9.0      | 3.4   | 7  | 0.57                                            | 0.57   | 0.14     | 0.05   |
| TX <sub>19</sub> | 64.5      | 5.3   | 10 | 23.9      | 9.9   | 10 | 20.4     | 9.8   | 10 | 0.36                                            | 0.10   | 0.31     | 0.06   |
| AX <sub>19</sub> | 80.3      | 2.2   | 9  | 80.5      | 2.7   | 9  | 79.4     | 3.1   | 9  | 1.00                                            | 1.00   | 0.99     | 1.01   |

**Table S3. Comparison of Indel frequencies of HH-X<sub>20</sub>, HH-gX<sub>19</sub> and gX<sub>19</sub> sgRNAs in combination with Cas9-WT and Cas9 variants in HeLa cells**

Indel frequencies (a) and relative indel frequencies of Cas9 variants normalized to that of Cas9-WT (b) at six target sites in HeLa cells.

**a**

| gene            | Indel (%)          |                     |                  |                    |                     |                  |                    |                     |                  |
|-----------------|--------------------|---------------------|------------------|--------------------|---------------------|------------------|--------------------|---------------------|------------------|
|                 | Cas9-WT            |                     |                  | eCas9-1.1          |                     |                  | Cas9-HF1           |                     |                  |
|                 | HH-X <sub>20</sub> | HH-gX <sub>19</sub> | gX <sub>19</sub> | HH-X <sub>20</sub> | HH-gX <sub>19</sub> | gX <sub>19</sub> | HH-X <sub>20</sub> | HH-gX <sub>19</sub> | gX <sub>19</sub> |
| <i>AAVS1-01</i> | 80.4               | 67.6                | 71.9             | 74.4               | 7.1                 | 6.7              | 73.6               | 1.7                 | 2.7              |
| <i>HBB-02</i>   | 67.3               | 70.4                | 78.2             | 64.7               | 52.1                | 44.8             | 52.0               | 19.3                | 16.4             |
| <i>HBB-03</i>   | 81.2               | 79.3                | 75.0             | 85.7               | 77.3                | 78.2             | 78.9               | 14.9                | 20.0             |
| <i>HBB-04</i>   | 49.5               | 58.2                | 48.4             | 56.1               | 25.8                | 33.0             | 48.3               | 2.4                 | 2.2              |
| <i>CCR5-01</i>  | 75.4               | 73.7                | 74.1             | 63.5               | 1.0                 | 1.4              | 40.4               | 0.2                 | 0.2              |
| <i>EMX1-05</i>  | 59.5               | 72.8                | 84.8             | 41.2               | 1.6                 | 5.1              | 34.5               | 1.2                 | 2.3              |
| Median          | 71.4               | 71.6                | 74.6             | 64.1               | 16.4                | 19.8             | 50.2               | 2.1                 | 2.5              |
| Mean            | 68.9               | 70.3                | 72.1             | 64.3               | 27.5                | 28.2             | 54.6               | 6.6                 | 7.3              |

**b**

| gene            | Relative Indel frequency, normalized to Cas9 WT |                     |                  |                    |                     |                  |
|-----------------|-------------------------------------------------|---------------------|------------------|--------------------|---------------------|------------------|
|                 | eCas9-1.1                                       |                     |                  | Cas9-HF1           |                     |                  |
|                 | HH-X <sub>20</sub>                              | HH-gX <sub>19</sub> | gX <sub>19</sub> | HH-X <sub>20</sub> | HH-gX <sub>19</sub> | gX <sub>19</sub> |
| <i>AAVS1-01</i> | 0.93                                            | 0.10                | 0.09             | 0.92               | 0.03                | 0.04             |
| <i>HBB-02</i>   | 0.96                                            | 0.74                | 0.57             | 0.77               | 0.27                | 0.21             |
| <i>HBB-03</i>   | 1.06                                            | 0.98                | 1.04             | 0.97               | 0.19                | 0.27             |
| <i>HBB-04</i>   | 1.13                                            | 0.44                | 0.68             | 0.98               | 0.04                | 0.05             |
| <i>CCR5-01</i>  | 0.84                                            | 0.01                | 0.02             | 0.54               | 0.00                | 0.00             |
| <i>EMX1-05</i>  | 0.69                                            | 0.02                | 0.06             | 0.58               | 0.02                | 0.03             |
| Median          | 0.94                                            | 0.27                | 0.33             | 0.84               | 0.03                | 0.04             |
| Mean            | 0.94                                            | 0.38                | 0.41             | 0.79               | 0.09                | 0.10             |

**Table S4. Comparison of Indel frequencies of HH-X<sub>20</sub>, HH-gX<sub>19</sub> and gX<sub>19</sub> sgRNAs in combination with Cas9-WT and Cas9 variants in HEK293T cells**

Indel frequencies (a) and relative indel frequencies of Cas9 variants normalized to that of Cas9-WT (b) at five target sites in HEK293T cells.

**a**

| gene            | Indel (%)          |                     |                  |                    |                     |                  |                    |                     |                  |
|-----------------|--------------------|---------------------|------------------|--------------------|---------------------|------------------|--------------------|---------------------|------------------|
|                 | Cas9-WT            |                     |                  | eCas9-1.1          |                     |                  | Cas9-HF1           |                     |                  |
|                 | HH-X <sub>20</sub> | HH-gX <sub>19</sub> | gX <sub>19</sub> | HH-X <sub>20</sub> | HH-gX <sub>19</sub> | gX <sub>19</sub> | HH-X <sub>20</sub> | HH-gX <sub>19</sub> | gX <sub>19</sub> |
| <i>AAVS1-01</i> | 77.7               | 66.1                | 73.8             | 54.1               | 4.1                 | 2.8              | 78.5               | 0.7                 | 0.8              |
| <i>HBB-02</i>   | 51.0               | 56.6                | 57.0             | 36.5               | 22.1                | 19.0             | 23.8               | 9.5                 | 6.1              |
| <i>HBB-03</i>   | 61.6               | 56.7                | 60.3             | 50.5               | 24.9                | 43.9             | 44.7               | 2.6                 | 4.1              |
| <i>HBB-04</i>   | 27.0               | 35.3                | 36.3             | 15.0               | 1.7                 | 4.0              | 13.6               | 0.5                 | 0.5              |
| <i>CCR5-01</i>  | 48.5               | 49.3                | 33.8             | 16.4               | 0.1                 | 0.3              | 4.7                | 0.0                 | 0.3              |
| Median          | 51.0               | 56.6                | 57.0             | 36.5               | 4.1                 | 4.0              | 23.8               | 0.7                 | 0.8              |
| Mean            | 53.2               | 52.8                | 52.2             | 34.5               | 10.6                | 14.0             | 33.1               | 2.7                 | 2.4              |

**b**

| gene            | Relative Indel frequency, normalized to Cas9 WT |                     |                  |                    |                     |                  |
|-----------------|-------------------------------------------------|---------------------|------------------|--------------------|---------------------|------------------|
|                 | eCas9-1.1                                       |                     |                  | Cas9-HF1           |                     |                  |
|                 | HH-X <sub>20</sub>                              | HH-gX <sub>19</sub> | gX <sub>19</sub> | HH-X <sub>20</sub> | HH-gX <sub>19</sub> | gX <sub>19</sub> |
| <i>AAVS1-01</i> | 0.70                                            | 0.06                | 0.04             | 1.01               | 0.01                | 0.01             |
| <i>HBB-02</i>   | 0.72                                            | 0.39                | 0.33             | 0.47               | 0.17                | 0.11             |
| <i>HBB-03</i>   | 0.82                                            | 0.44                | 0.73             | 0.73               | 0.05                | 0.07             |
| <i>HBB-04</i>   | 0.55                                            | 0.05                | 0.11             | 0.50               | 0.01                | 0.01             |
| <i>CCR5-01</i>  | 0.34                                            | 0.00                | 0.01             | 0.10               | 0.00                | 0.01             |
| Median          | 0.70                                            | 0.06                | 0.11             | 0.50               | 0.01                | 0.01             |
| Mean            | 0.62                                            | 0.19                | 0.24             | 0.56               | 0.05                | 0.04             |
